# Supplementary material
Source: publisher figshare collection journal article supplement (https://tandf.figshare.com/ndownloader/files/15315584)
Supplement: Supplementary file 1 [file 15315584]

**SI1 - Experimental pot designs**


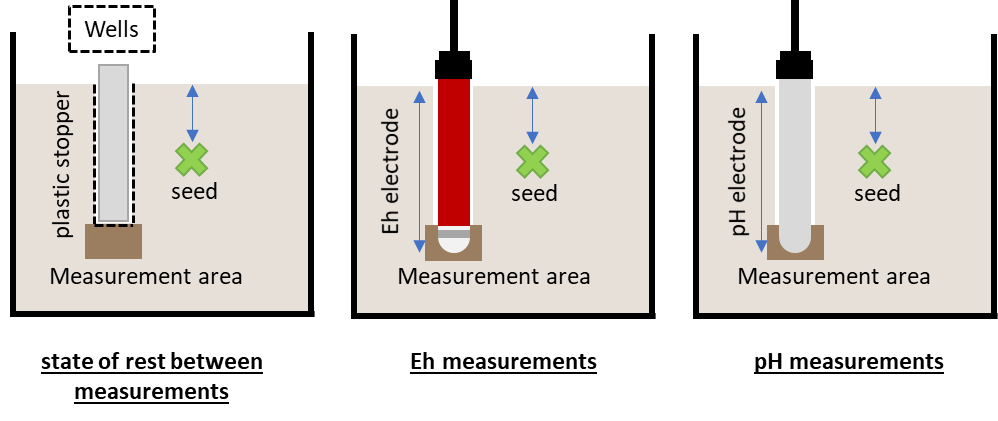


Figure SI1-1 : Illustration of the experimental pot design

For each pot a 6 cm deep "measuring well" was made at the beginning of the experiment. During measurements, electrodes were located in the well, in contact with the soil

**SI2 - Impact of the release of KCl by pH and Eh electrodes on the soil**

Table SI2-1 Conductivity measurements ( in μS/cm) of soil suspension (100g of soil in 250g of distilled water) within pH and Eh electrode

|  | **conductivity cell (CC)** | **CC + pH electrode RADIOMETER ANALYTICAL PHC2051** | **CC + Eh electrode CONSORT SO50X(μS/cm)** | **CC + pH poor-quality electrodes (over-)used** |
| --- | --- | --- | --- | --- |
| Time (minutes) | **** **(μS/cm)** | **** **(μS/cm)** | **** **(μS/cm)** | **** **(μS/cm)** |
| 0 | 176 | 177 | 175 | 169 |
| 5 | 175 | 177 | 177 | 194 |
| 10 | 176 | 198 | 186 | 203 |
| 15 | 175 | 182 | 183 | 214 |
| 20 | 175 | 185 | 193 | 238 |
| 25 | 179 | 182 | 193 | 268 |
| 30 | 178 | 184 | 197 | 292 |
| 35 | 176 | 186 | 195 | 298 |
| 40 | 177 | 188 | 191 | 325 |
| 45 | 176 | 195 | 195 | 330 |
| 50 | 178 | 208 | 198 | 346 |
| 55 | 176 | 215 | 202 | 378 |
| 60 | 176 | 214 | 218 | 426 |
| 70 | 175 | 216 | 225 | 472 |
| 80 | 179 | 218 | 214 | 505 |
| 90 | 179 | 224 | 223 | 528 |
| 100 | 177 | 223 | 224 | 580 |
| 110 | 175 | 225 | 230 | 594 |
| 120 | 175 | 230 | 230 | 602 |

Eh and pH electrodes were placed separately in a soil suspension (100g of soil in 250g of distilled water) within a conductivity cell (RADIOMETER ANALYTICAL CDC745-9). They were left in the soil suspension for 120 minutes. Conductivity was recorded continuously during this time.

**SI3-Example of the evolution with time of measured Eh and determination of the trend line**


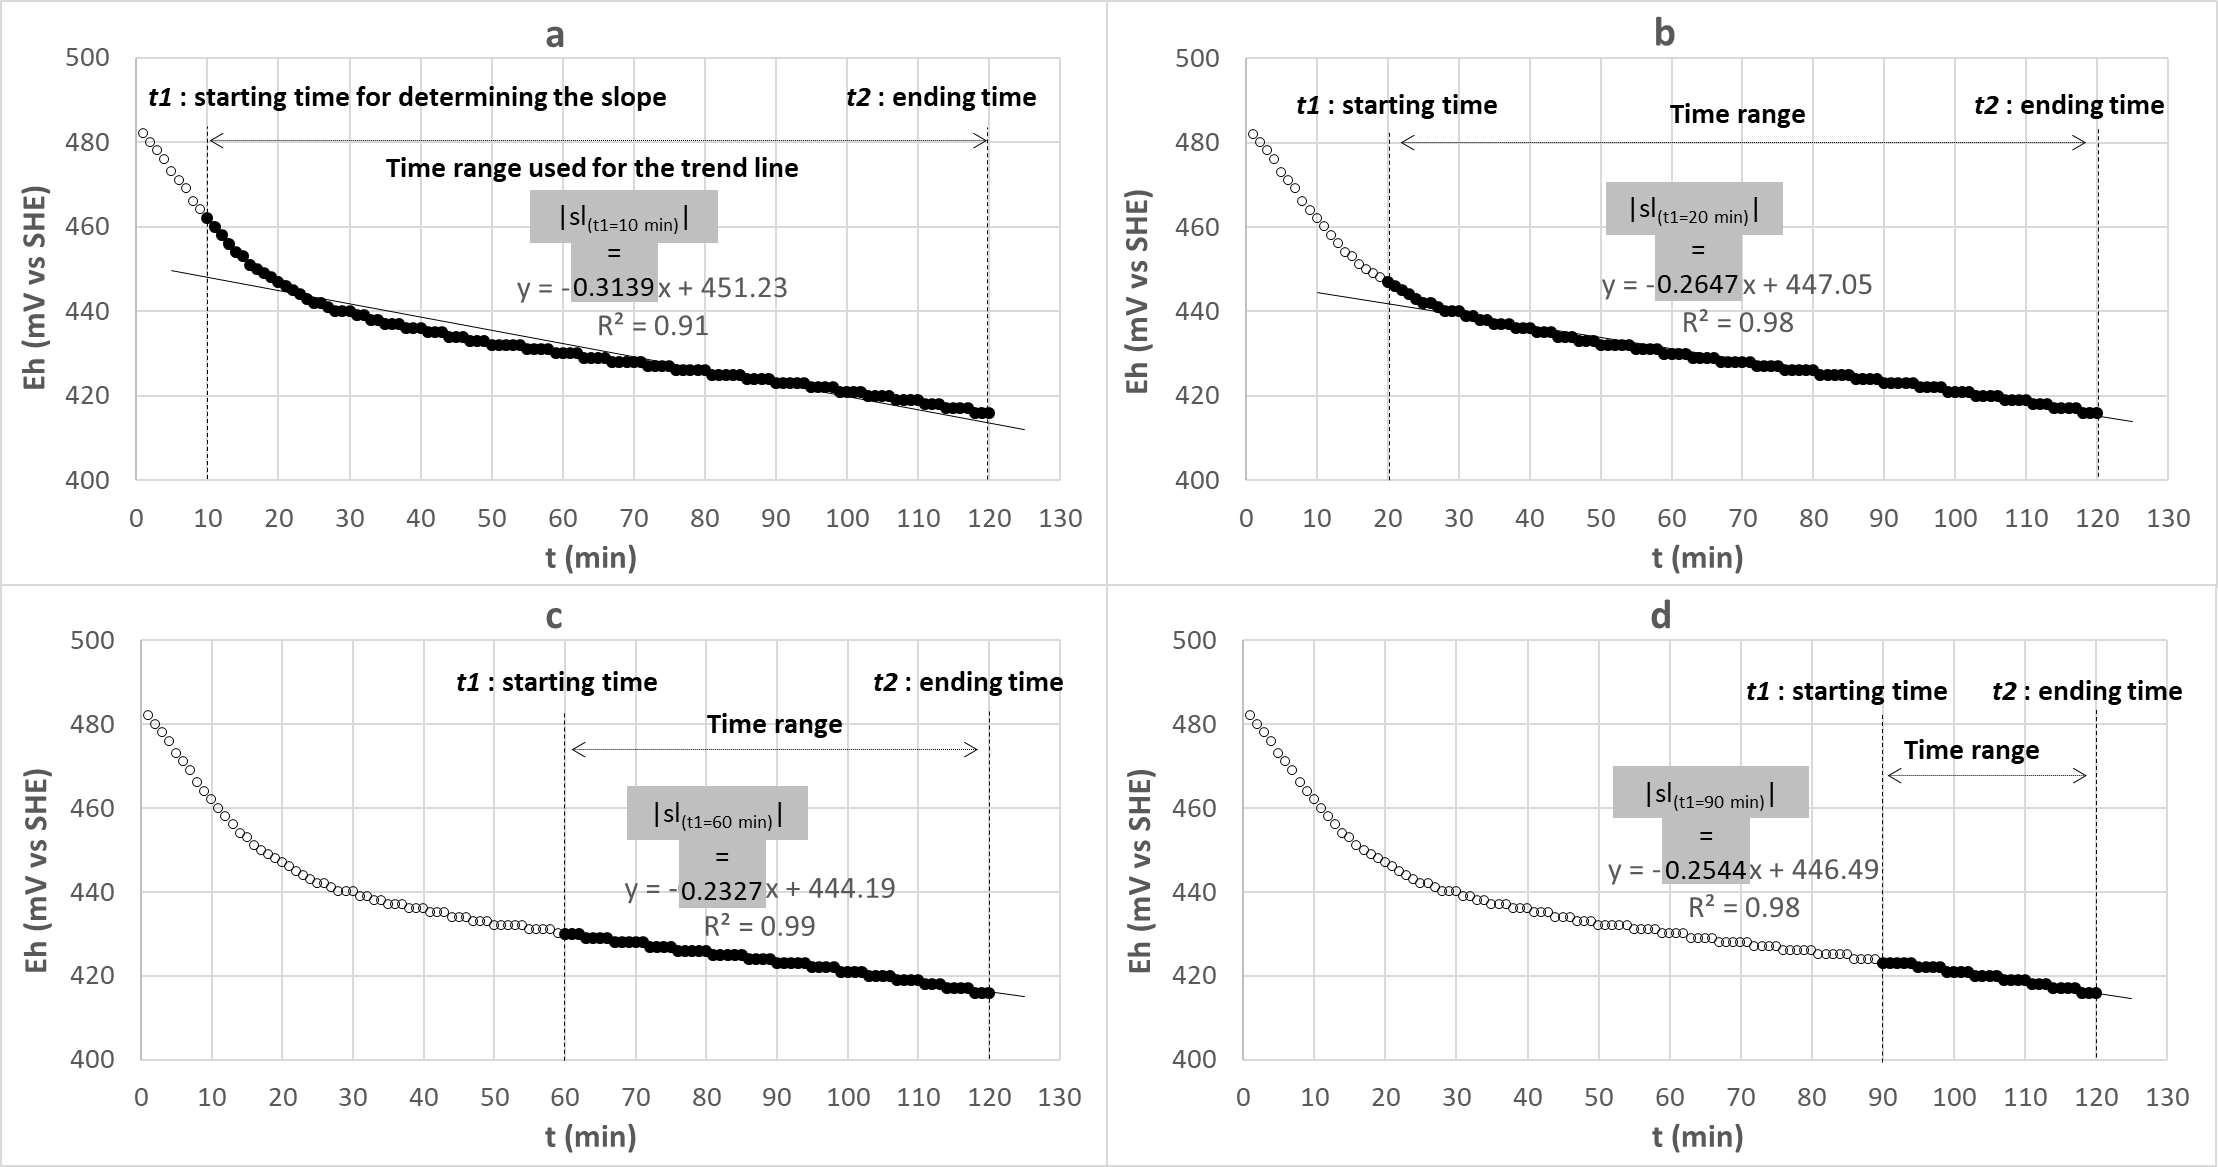


Figure SI3-1 : Influence of the starting time (t1) on the slope (sl(t1=x min)) of the trend line to determine the stabilization of the redox of a same measurement: starting time (t1) of the trend line set at 10 (a), 20 (b), 60 (c) and 90 minutes (d).

An example of the evolution of measured Eh with time is given in Figure SI3-1. In a first analysis an asymptotic point located at t1 = 20 min is highlighted. Between 0 and 15 minutes, the Eh value was not stable and decreased strongly during this period (△E = 40mV in 0-15min). Between 15 and 30 minutes, there was a change of curve and after 30 minutes, the Eh appeared stable and its rate of change was constant over time (△E = 5mV in 15-30 min and △E = 30 mV in 30-100 min). Even after an extended monitoring period (> 60 minutes), the Eh continued to decrease at the same rate of change over the time. For the main experiment, it was necessary that a standard and consistent measurement time be used, defined from the optimal measurement time tests.

**SI4-Identification optimal Measurement Time**

Table SI4-1 : 120 min x 42 curves

| **t1 starting time ** | **Pot ** | S0a-1 | S0b-1 | S0c-1 | S0a-2 | S0b-2 | S0c-2 | S0a-3 | S0b-3 | S0c-3 | S0a-4 | S0b-4 | S0c-4 | S0a-5 | S0b-5 | S0c-5 | S0a-6 | S0b-6 | S0c-6 | S0a-7 | S0b-7 | S0c-7 |
| --- | --- | --- | --- | --- | --- | --- | --- | --- | --- | --- | --- | --- | --- | --- | --- | --- | --- | --- | --- | --- | --- | --- |
| **1** | **slope** | 0.492 | 0.507 | 1.890 | 1.023 | 0.023 | 0.191 | 0.426 | 0.318 | 0.746 | 0.366 | 0.036 | 0.118 | 1.240 | 0.066 | 0.548 | 0.287 | 0.171 | 0.156 | 1.435 | 1.852 | 0.386 |
|  | **r2** | 0.933 | 0.888 | 0.995 | 0.936 | 0.643 | 0.919 | 0.820 | 0.821 | 0.997 | 0.896 | 0.317 | 0.893 | 0.946 | 0.587 | 0.999 | 0.858 | 0.977 | 0.984 | 0.930 | 0.985 | 0.774 |
| **3** | **slope** | 0.478 | 0.488 | 1.901 | 1.016 | 0.023 | 0.184 | 0.411 | 0.302 | 0.746 | 0.351 | 0.031 | 0.114 | 1.208 | 0.059 | 0.549 | 0.275 | 0.169 | 0.154 | 1.406 | 1.860 | 0.354 |
|  | **r2** | 0.941 | 0.899 | 0.995 | 0.933 | 0.636 | 0.933 | 0.837 | 0.835 | 0.997 | 0.913 | 0.285 | 0.905 | 0.954 | 0.599 | 0.999 | 0.868 | 0.979 | 0.984 | 0.931 | 0.985 | 0.836 |
| **5** | **slope** | 0.465 | 0.471 | 1.907 | 0.998 | 0.024 | 0.178 | 0.406 | 0.287 | 0.744 | 0.340 | 0.026 | 0.110 | 1.180 | 0.054 | 0.549 | 0.264 | 0.167 | 0.153 | 1.377 | 1.866 | 0.332 |
|  | **r2** | 0.949 | 0.908 | 0.995 | 0.933 | 0.640 | 0.944 | 0.858 | 0.850 | 0.997 | 0.922 | 0.249 | 0.913 | 0.960 | 0.606 | 0.999 | 0.878 | 0.979 | 0.985 | 0.932 | 0.984 | 0.872 |
| **7** | **slope** | 0.452 | 0.456 | 1.912 | 0.978 | 0.023 | 0.173 | 0.338 | 0.274 | 0.742 | 0.331 | 0.021 | 0.106 | 1.154 | 0.049 | 0.548 | 0.254 | 0.166 | 0.152 | 1.358 | 1.872 | 0.316 |
|  | **r2** | 0.958 | 0.915 | 0.995 | 0.934 | 0.623 | 0.953 | 0.879 | 0.864 | 0.997 | 0.928 | 0.209 | 0.921 | 0.964 | 0.619 | 0.999 | 0.886 | 0.979 | 0.986 | 0.933 | 0.984 | 0.895 |
| **10** | **slope** | 0.434 | 0.436 | 1.916 | 0.948 | 0.022 | 0.166 | 0.314 | 0.256 | 0.739 | 0.315 | 0.015 | 0.102 | 1.121 | 0.043 | 0.548 | 0.240 | 0.163 | 0.149 | 1.323 | 1.879 | 0.296 |
|  | **r2** | 0.972 | 0.924 | 0.995 | 0.936 | 0.593 | 0.966 | 0.912 | 0.884 | 0.997 | 0.943 | 0.145 | 0.927 | 0.970 | 0.628 | 0.999 | 0.900 | 0.979 | 0.987 | 0.935 | 0.983 | 0.918 |
| **12** | **slope** | 0.424 | 0.424 | 1.917 | 0.928 | 0.022 | 0.163 | 0.300 | 0.245 | 0.736 | 0.306 | 0.011 | 0.099 | 1.102 | 0.039 | 0.549 | 0.231 | 0.162 | 0.148 | 1.294 | 1.883 | 0.286 |
|  | **r2** | 0.979 | 0.930 | 0.994 | 0.938 | 0.571 | 0.971 | 0.931 | 0.896 | 0.997 | 0.949 | 0.100 | 0.933 | 0.973 | 0.634 | 0.999 | 0.910 | 0.979 | 0.987 | 0.938 | 0.982 | 0.931 |
| **14** | **slope** | 0.416 | 0.412 | 1.916 | 0.908 | 0.021 | 0.159 | 0.289 | 0.236 | 0.734 | 0.300 | 0.008 | 0.097 | 1.083 | 0.036 | 0.549 | 0.223 | 0.161 | 0.147 | 1.264 | 1.886 | 0.277 |
|  | **r2** | 0.984 | 0.935 | 0.994 | 0.940 | 0.547 | 0.976 | 0.947 | 0.907 | 0.997 | 0.953 | 0.059 | 0.935 | 0.976 | 0.635 | 0.999 | 0.919 | 0.978 | 0.987 | 0.941 | 0.981 | 0.939 |
| **16** | **slope** | 0.409 | 0.401 | 1.914 | 0.889 | 0.020 | 0.156 | 0.280 | 0.228 | 0.733 | 0.293 | 0.005 | 0.095 | 1.066 | 0.033 | 0.549 | 0.216 | 0.159 | 0.146 | 1.234 | 1.889 | 0.269 |
|  | **r2** | 0.988 | 0.940 | 0.994 | 0.942 | 0.521 | 0.980 | 0.960 | 0.915 | 0.997 | 0.956 | 0.026 | 0.938 | 0.978 | 0.626 | 0.999 | 0.927 | 0.978 | 0.988 | 0.944 | 0.980 | 0.946 |
| **18** | **slope** | 0.403 | 0.392 | 1.909 | 0.869 | 0.019 | 0.154 | 0.272 | 0.220 | 0.731 | 0.286 | 0.002 | 0.093 | 1.049 | 0.031 | 0.548 | 0.210 | 0.158 | 0.144 | 1.215 | 1.890 | 0.261 |
|  | **r2** | 0.990 | 0.943 | 0.993 | 0.944 | 0.493 | 0.983 | 0.969 | 0.923 | 0.997 | 0.960 | 0.004 | 0.940 | 0.980 | 0.612 | 0.999 | 0.933 | 0.978 | 0.988 | 0.948 | 0.979 | 0.953 |
| **20** | **slope** | 0.398 | 0.382 | 1.903 | 0.848 | 0.018 | 0.152 | 0.265 | 0.213 | 0.730 | 0.281 | 0.000 | 0.090 | 1.034 | 0.028 | 0.400 | 0.204 | 0.157 | 0.143 | 1.205 | 1.891 | 0.255 |
|  | **r2** | 0.992 | 0.947 | 0.993 | 0.947 | 0.462 | 0.984 | 0.977 | 0.928 | 0.997 | 0.963 | 0.000 | 0.942 | 0.982 | 0.606 | 0.999 | 0.939 | 0.977 | 0.989 | 0.953 | 0.978 | 0.959 |
| **25** | **slope** | 0.388 | 0.360 | 1.882 | 0.798 | 0.014 | 0.147 | 0.252 | 0.198 | 0.731 | 0.268 | 0.006 | 0.085 | 1.000 | 0.023 | 0.400 | 0.191 | 0.153 | 0.141 | 1.202 | 1.887 | 0.241 |
|  | **r2** | 0.995 | 0.955 | 0.993 | 0.957 | 0.375 | 0.988 | 0.989 | 0.941 | 0.996 | 0.969 | 0.063 | 0.948 | 0.985 | 0.560 | 0.999 | 0.949 | 0.977 | 0.989 | 0.963 | 0.974 | 0.969 |
| **30** | **slope** | 0.381 | 0.342 | 1.850 | 0.749 | 0.012 | 0.144 | 0.244 | 0.186 | 0.736 | 0.256 | 0.012 | 0.082 | 0.970 | 0.019 | 0.390 | 0.181 | 0.148 | 0.139 | 1.180 | 1.875 | 0.229 |
|  | **r2** | 0.996 | 0.959 | 0.993 | 0.969 | 0.286 | 0.989 | 0.993 | 0.950 | 0.996 | 0.974 | 0.196 | 0.949 | 0.988 | 0.498 | 0.999 | 0.953 | 0.977 | 0.989 | 0.971 | 0.970 | 0.977 |
| **35** | **slope** | 0.375 | 0.325 | 1.813 | 0.708 | 0.009 | 0.141 | 0.239 | 0.175 | 0.743 | 0.245 | 0.016 | 0.078 | 0.943 | 0.017 | 0.390 | 0.172 | 0.144 | 0.136 | 1.157 | 1.852 | 0.220 |
|  | **r2** | 0.997 | 0.963 | 0.994 | 0.980 | 0.183 | 0.990 | 0.995 | 0.956 | 0.996 | 0.979 | 0.335 | 0.949 | 0.990 | 0.422 | 0.999 | 0.955 | 0.979 | 0.989 | 0.979 | 0.964 | 0.981 |
| **40** | **slope** | 0.371 | 0.310 | 1.774 | 0.676 | 0.006 | 0.139 | 0.235 | 0.165 | 0.752 | 0.236 | 0.020 | 0.075 | 0.919 | 0.014 | 0.380 | 0.163 | 0.139 | 0.133 | 1.136 | 1.815 | 0.212 |
|  | **r2** | 0.997 | 0.966 | 0.995 | 0.988 | 0.085 | 0.989 | 0.996 | 0.961 | 0.996 | 0.983 | 0.431 | 0.945 | 0.992 | 0.325 | 0.999 | 0.957 | 0.980 | 0.989 | 0.986 | 0.958 | 0.984 |
| **45** | **slope** | 0.366 | 0.297 | 1.736 | 0.653 | 0.005 | 0.136 | 0.233 | 0.158 | 0.762 | 0.227 | 0.025 | 0.072 | 0.896 | 0.010 | 0.380 | 0.155 | 0.135 | 0.131 | 1.125 | 1.763 | 0.205 |
|  | **r2** | 0.998 | 0.966 | 0.997 | 0.991 | 0.061 | 0.989 | 0.996 | 0.962 | 0.996 | 0.985 | 0.560 | 0.938 | 0.994 | 0.201 | 0.999 | 0.958 | 0.979 | 0.989 | 0.992 | 0.951 | 0.987 |
| **50** | **slope** | 0.362 | 0.285 | 1.702 | 0.634 | 0.004 | 0.135 | 0.232 | 0.149 | 0.773 | 0.220 | 0.031 | 0.068 | 0.875 | 0.009 | 0.380 | 0.147 | 0.130 | 0.130 | 1.103 | 1.694 | 0.199 |
|  | **r2** | 0.998 | 0.964 | 0.998 | 0.993 | 0.037 | 0.988 | 0.995 | 0.966 | 0.997 | 0.987 | 0.735 | 0.937 | 0.995 | 0.146 | 0.999 | 0.959 | 0.981 | 0.987 | 0.996 | 0.944 | 0.988 |
| **60** | **slope** | 0.356 | 0.258 | 1.656 | 0.605 | 0.001 | 0.131 | 0.233 | 0.135 | 0.798 | 0.207 | 0.038 | 0.061 | 0.837 | 0.007 | 0.370 | 0.132 | 0.122 | 0.127 | 1.068 | 1.501 | 0.188 |
|  | **r2** | 0.997 | 0.961 | 0.999 | 0.995 | 0.001 | 0.984 | 0.993 | 0.966 | 0.998 | 0.989 | 0.813 | 0.918 | 0.998 | 0.064 | 0.999 | 0.959 | 0.981 | 0.983 | 0.999 | 0.932 | 0.990 |
| **70** | **slope** | 0.352 | 0.230 | 1.638 | 0.584 | 0.010 | 0.132 | 0.238 | 0.124 | 0.824 | 0.196 | 0.044 | 0.055 | 0.812 | 0.000 | 0.370 | 0.118 | 0.121 | 0.126 | 1.031 | 1.239 | 0.181 |
|  | **r2** | 0.996 | 0.955 | 1.000 | 0.995 | 0.083 | 0.977 | 0.991 | 0.956 | 0.999 | 0.988 | 0.846 | 0.879 | 0.999 | - | 0.998 | 0.951 | 0.972 | 0.974 | 0.998 | 0.931 | 0.988 |
| **80** | **slope** | 0.347 | 0.196 | 1.649 | 0.580 | 0.036 | 0.128 | 0.246 | 0.109 | 0.840 | 0.190 | 0.037 | 0.050 | 0.793 | 0.021 | 0.360 | 0.105 | 0.120 | 0.125 | 1.002 | 0.965 | 0.180 |
|  | **r2** | 0.995 | 0.947 | 0.999 | 0.990 | 0.739 | 0.961 | 0.988 | 0.946 | 0.999 | 0.982 | 0.718 | 0.782 | 0.999 | 0.252 | 0.997 | 0.929 | 0.953 | 0.962 | 0.998 | 0.948 | 0.982 |
| **90** | **slope** | 0.335 | 0.158 | 1.677 | 0.591 | 0.047 | 0.130 | 0.254 | 0.100 | 0.842 | 0.185 | 0.048 | 0.049 | 0.780 | 0.014 | 0.360 | 0.087 | 0.107 | 0.132 | 1.011 | 0.746 | 0.176 |
|  | **r2** | 0.992 | 0.923 | 0.999 | 0.980 | 0.731 | 0.940 | 0.982 | 0.897 | 0.999 | 0.967 | 0.750 | 0.668 | 0.998 | 0.064 | 0.996 | 0.876 | 0.917 | 0.944 | 0.998 | 0.968 | 0.969 |
| **100** | **slope** | 0.336 | 0.121 | 1.731 | 0.552 | 0.035 | 0.129 | 0.269 | 0.084 | 0.832 | 0.183 | 0.058 | 0.025 | 0.765 | 0.071 | 0.350 | 0.068 | 0.103 | 0.140 | 0.992 | 0.592 | 0.175 |
|  | **r2** | 0.983 | 0.848 | 0.999 | 0.950 | 0.368 | 0.868 | 0.972 | 0.758 | 0.997 | 0.928 | 0.614 | 0.259 | 0.996 | 0.750 | 0.994 | 0.709 | 0.826 | 0.894 | 0.997 | 0.983 | 0.938 |
| **110** | **slope** | 0.327 | 0.082 | 1.827 | 0.410 | 0.000 | 0.091 | 0.282 | 0.000 | 0.864 | 0.182 | 0.000 | 0.082 | 0.764 | 0.045 | 0.350 | 0.000 | 0.127 | 0.127 | 0.901 | 0.500 | 0.136 |
|  | **r2** | 0.939 | 0.450 | 0.998 | 0.948 | - | 0.455 | 0.907 | - | 0.992 | 0.800 | - | 0.450 | 0.988 | 0.250 | 0.990 | - | 0.700 | 0.613 | 0.992 | 0.976 | 0.750 |
|  |  |  |  |  |  |  |  |  |  |  |  |  |  |  |  |  |  |  |  |  |  |  |
|  |  |  |  |  |  |  |  |  |  |  |  |  |  |  |  |  |  |  |  |  |  |  |
| **t1 starting time ** | **Pot ** | S0a-8 | S0b-8 | S0c-8 | S0a-9 | S0b-9 | S0c-9 | S0a-10 | S0b-10 | S0c-10 | S0a-11 | S0b-11 | S0c-11 | S0a-12 | S0b-12 | S0c-12 | S0a-13 | S0b-13 | S0c-13 | S0a-14 | S0b-14 | S0c-14 |
| **1** | **slope** | 0.136 | 0.539 | 0.190 | 0.289 | 0.841 | 1.168 | 0.375 | 0.146 | 1.199 | 0.129 | 0.654 | 0.227 | 1.196 | 0.188 | 0.062 | 0.026 | 0.060 | 0.604 | 0.017 | 1.410 | 0.408 |
|  | **r2** | 0.868 | 0.831 | 0.678 | 0.689 | 0.954 | 0.997 | 0.833 | 0.884 | 0.972 | 0.924 | 0.967 | 0.812 | 0.953 | 0.717 | 0.954 | 0.572 | 0.768 | 0.905 | 0.126 | 0.930 | 0.953 |
| **3** | **slope** | 0.131 | 0.513 | 0.174 | 0.267 | 0.861 | 1.173 | 0.386 | 0.140 | 1.192 | 0.134 | 0.661 | 0.216 | 1.060 | 0.174 | 0.063 | 0.030 | 0.056 | 0.576 | 0.009 | 1.384 | 0.413 |
|  | **r2** | 0.882 | 0.847 | 0.705 | 0.705 | 0.964 | 0.997 | 0.847 | 0.897 | 0.971 | 0.955 | 0.968 | 0.824 | 0.955 | 0.740 | 0.966 | 0.788 | 0.801 | 0.931 | 0.103 | 0.931 | 0.955 |
| **5** | **slope** | 0.126 | 0.489 | 0.161 | 0.247 | 0.879 | 1.175 | 0.397 | 0.135 | 1.182 | 0.138 | 0.666 | 0.206 | 1.195 | 0.161 | 0.063 | 0.032 | 0.055 | 0.555 | 0.005 | 1.356 | 0.416 |
|  | **r2** | 0.891 | 0.861 | 0.724 | 0.726 | 0.971 | 0.997 | 0.858 | 0.906 | 0.970 | 0.969 | 0.968 | 0.834 | 0.954 | 0.772 | 0.966 | 0.880 | 0.793 | 0.947 | 0.057 | 0.932 | 0.954 |
| **7** | **slope** | 0.122 | 0.467 | 0.149 | 0.228 | 0.895 | 1.177 | 0.408 | 0.131 | 1.171 | 0.141 | 0.669 | 0.196 | 1.101 | 0.149 | 0.063 | 0.033 | 0.054 | 0.538 | 0.002 | 1.328 | 0.416 |
|  | **r2** | 0.897 | 0.873 | 0.739 | 0.751 | 0.977 | 0.997 | 0.869 | 0.917 | 0.970 | 0.975 | 0.967 | 0.843 | 0.952 | 0.813 | 0.965 | 0.899 | 0.783 | 0.959 | 0.013 | 0.933 | 0.952 |
| **10** | **slope** | 0.116 | 0.440 | 0.135 | 0.204 | 0.917 | 1.178 | 0.423 | 0.125 | 1.152 | 0.144 | 0.672 | 0.184 | 1.105 | 0.133 | 0.063 | 0.034 | 0.055 | 0.518 | 0.001 | 1.286 | 0.415 |
|  | **r2** | 0.906 | 0.888 | 0.758 | 0.792 | 0.983 | 0.996 | 0.882 | 0.927 | 0.969 | 0.983 | 0.965 | 0.856 | 0.948 | 0.876 | 0.963 | 0.906 | 0.770 | 0.970 | 0.007 | 0.935 | 0.948 |
| **12** | **slope** | 0.112 | 0.423 | 0.127 | 0.190 | 0.930 | 1.178 | 0.434 | 0.121 | 1.139 | 0.146 | 0.672 | 0.176 | 1.021 | 0.126 | 0.062 | 0.034 | 0.055 | 0.508 | 0.002 | 1.257 | 0.413 |
|  | **r2** | 0.909 | 0.896 | 0.768 | 0.819 | 0.987 | 0.996 | 0.890 | 0.934 | 0.969 | 0.987 | 0.963 | 0.864 | 0.945 | 0.903 | 0.962 | 0.903 | 0.766 | 0.974 | 0.043 | 0.938 | 0.945 |
| **14** | **slope** | 0.110 | 0.408 | 0.119 | 0.178 | 0.942 | 1.177 | 0.444 | 0.118 | 1.125 | 0.148 | 0.671 | 0.169 | 1.018 | 0.121 | 0.061 | 0.034 | 0.056 | 0.499 | 0.003 | 1.228 | 0.410 |
|  | **r2** | 0.911 | 0.904 | 0.776 | 0.850 | 0.989 | 0.996 | 0.897 | 0.940 | 0.970 | 0.988 | 0.961 | 0.873 | 0.942 | 0.920 | 0.962 | 0.899 | 0.768 | 0.978 | 0.087 | 0.941 | 0.942 |
| **16** | **slope** | 0.107 | 0.394 | 0.112 | 0.167 | 0.954 | 1.175 | 0.454 | 0.115 | 1.110 | 0.149 | 0.668 | 0.162 | 1.015 | 0.116 | 0.060 | 0.035 | 0.058 | 0.491 | 0.003 | 1.198 | 0.405 |
|  | **r2** | 0.913 | 0.911 | 0.784 | 0.877 | 0.992 | 0.996 | 0.903 | 0.943 | 0.970 | 0.989 | 0.959 | 0.881 | 0.940 | 0.934 | 0.965 | 0.894 | 0.778 | 0.980 | 0.098 | 0.944 | 0.940 |
| **18** | **slope** | 0.104 | 0.381 | 0.106 | 0.158 | 0.964 | 1.173 | 0.465 | 0.112 | 1.095 | 0.150 | 0.665 | 0.155 | 1.012 | 0.113 | 0.059 | 0.035 | 0.060 | 0.484 | 0.003 | 1.169 | 0.400 |
|  | **r2** | 0.916 | 0.918 | 0.790 | 0.899 | 0.993 | 0.995 | 0.910 | 0.947 | 0.970 | 0.989 | 0.956 | 0.889 | 0.938 | 0.944 | 0.966 | 0.888 | 0.788 | 0.982 | 0.112 | 0.948 | 0.938 |
| **20** | **slope** | 0.101 | 0.369 | 0.100 | 0.151 | 0.974 | 1.171 | 0.475 | 0.109 | 1.080 | 0.151 | 0.661 | 0.150 | 1.009 | 0.109 | 0.059 | 0.034 | 0.062 | 0.477 | 0.004 | 1.140 | 0.393 |
|  | **r2** | 0.916 | 0.924 | 0.799 | 0.921 | 0.995 | 0.995 | 0.916 | 0.952 | 0.971 | 0.989 | 0.954 | 0.896 | 0.937 | 0.952 | 0.964 | 0.881 | 0.798 | 0.984 | 0.127 | 0.953 | 0.937 |
| **25** | **slope** | 0.095 | 0.342 | 0.087 | 0.137 | 0.995 | 1.161 | 0.502 | 0.103 | 1.042 | 0.153 | 0.649 | 0.137 | 1.013 | 0.103 | 0.056 | 0.034 | 0.066 | 0.463 | 0.005 | 1.074 | 0.374 |
|  | **r2** | 0.920 | 0.937 | 0.815 | 0.955 | 0.997 | 0.995 | 0.930 | 0.962 | 0.973 | 0.990 | 0.947 | 0.909 | 0.936 | 0.963 | 0.965 | 0.862 | 0.823 | 0.988 | 0.173 | 0.963 | 0.936 |
| **30** | **slope** | 0.088 | 0.318 | 0.076 | 0.128 | 1.011 | 1.147 | 0.530 | 0.099 | 1.004 | 0.156 | 0.635 | 0.126 | 1.009 | 0.098 | 0.056 | 0.032 | 0.072 | 0.451 | 0.006 | 1.019 | 0.351 |
|  | **r2** | 0.923 | 0.950 | 0.829 | 0.971 | 0.999 | 0.995 | 0.942 | 0.964 | 0.975 | 0.990 | 0.939 | 0.922 | 0.941 | 0.972 | 0.960 | 0.841 | 0.849 | 0.989 | 0.236 | 0.971 | 0.941 |
| **35** | **slope** | 0.083 | 0.299 | 0.067 | 0.123 | 1.023 | 1.129 | 0.557 | 0.095 | 0.965 | 0.156 | 0.620 | 0.117 | 0.995 | 0.094 | 0.056 | 0.029 | 0.078 | 0.441 | 0.007 | 0.970 | 0.328 |
|  | **r2** | 0.922 | 0.958 | 0.834 | 0.976 | 0.999 | 0.995 | 0.952 | 0.966 | 0.979 | 0.988 | 0.928 | 0.927 | 0.949 | 0.973 | 0.958 | 0.830 | 0.877 | 0.990 | 0.278 | 0.979 | 0.949 |
| **40** | **slope** | 0.078 | 0.282 | 0.059 | 0.118 | 1.031 | 1.108 | 0.586 | 0.091 | 0.927 | 0.155 | 0.601 | 0.109 | 0.991 | 0.092 | 0.058 | 0.027 | 0.084 | 0.431 | 0.003 | 0.924 | 0.307 |
|  | **r2** | 0.917 | 0.965 | 0.845 | 0.981 | 1.000 | 0.996 | 0.963 | 0.967 | 0.982 | 0.987 | 0.915 | 0.929 | 0.959 | 0.972 | 0.959 | 0.822 | 0.905 | 0.990 | 0.137 | 0.986 | 0.959 |
| **45** | **slope** | 0.073 | 0.266 | 0.052 | 0.114 | 1.034 | 1.088 | 0.615 | 0.088 | 0.893 | 0.153 | 0.576 | 0.103 | 0.988 | 0.089 | 0.059 | 0.025 | 0.092 | 0.422 | 0.000 | 0.886 | 0.287 |
|  | **r2** | 0.911 | 0.972 | 0.851 | 0.983 | 1.000 | 0.997 | 0.970 | 0.963 | 0.985 | 0.985 | 0.900 | 0.925 | 0.970 | 0.971 | 0.955 | 0.786 | 0.933 | 0.991 | - | 0.992 | 0.970 |
| **50** | **slope** | 0.069 | 0.253 | 0.046 | 0.112 | 1.036 | 1.071 | 0.643 | 0.086 | 0.861 | 0.152 | 0.542 | 0.097 | 0.966 | 0.086 | 0.059 | 0.022 | 0.095 | 0.413 | 0.000 | 0.857 | 0.271 |
|  | **r2** | 0.902 | 0.977 | 0.846 | 0.980 | 1.000 | 0.998 | 0.977 | 0.958 | 0.988 | 0.982 | 0.883 | 0.918 | 0.978 | 0.968 | 0.945 | 0.752 | 0.931 | 0.991 | - | 0.996 | 0.978 |
| **60** | **slope** | 0.060 | 0.231 | 0.036 | 0.107 | 1.030 | 1.043 | 0.698 | 0.080 | 0.801 | 0.147 | 0.446 | 0.084 | 0.950 | 0.084 | 0.057 | 0.024 | 0.105 | 0.390 | 0.000 | 0.826 | 0.246 |
|  | **r2** | 0.871 | 0.982 | 0.830 | 0.977 | 1.000 | 0.998 | 0.986 | 0.946 | 0.994 | 0.975 | 0.846 | 0.898 | 0.987 | 0.959 | 0.930 | 0.734 | 0.941 | 0.993 | - | 0.999 | 0.987 |
| **70** | **slope** | 0.051 | 0.213 | 0.029 | 0.107 | 1.025 | 1.021 | 0.751 | 0.074 | 0.758 | 0.140 | 0.317 | 0.071 | 0.924 | 0.079 | 0.054 | 0.025 | 0.110 | 0.370 | 0.000 | 0.829 | 0.230 |
|  | **r2** | 0.807 | 0.984 | 0.750 | 0.967 | 1.000 | 0.998 | 0.992 | 0.923 | 0.997 | 0.964 | 0.831 | 0.858 | 0.989 | 0.941 | 0.889 | 0.646 | 0.921 | 0.996 | - | 0.998 | 0.989 |
| **80** | **slope** | 0.039 | 0.199 | 0.034 | 0.108 | 1.035 | 0.996 | 0.805 | 0.067 | 0.740 | 0.126 | 0.200 | 0.057 | 0.907 | 0.076 | 0.057 | 0.018 | 0.123 | 0.358 | 0.000 | 0.847 | 0.219 |
|  | **r2** | 0.690 | 0.980 | 0.696 | 0.950 | 1.000 | 0.998 | 0.996 | 0.880 | 0.996 | 0.951 | 0.830 | 0.759 | 0.985 | 0.905 | 0.854 | 0.375 | 0.908 | 0.995 | - | 0.998 | 0.985 |
| **90** | **slope** | 0.044 | 0.183 | 0.026 | 0.105 | 1.048 | 0.960 | 0.851 | 0.070 | 0.758 | 0.110 | 0.116 | 0.062 | 1.020 | 0.077 | 0.048 | 0.000 | 0.154 | 0.348 | 0.000 | 0.872 | 0.212 |
|  | **r2** | 0.688 | 0.969 | 0.406 | 0.910 | 0.999 | 0.999 | 0.998 | 0.830 | 0.993 | 0.910 | 0.816 | 0.677 | 0.977 | 0.830 | 0.750 | - | 0.938 | 0.992 | - | 0.998 | 0.977 |
| **100** | **slope** | 0.071 | 0.168 | 0.000 | 0.096 | 1.052 | 0.930 | 0.882 | 0.070 | 0.834 | 0.108 | 0.058 | 0.064 | 1.000 | 0.079 | 0.058 | 0.000 | 0.179 | 0.348 | 0.000 | 0.874 | 0.204 |
|  | **r2** | 0.750 | 0.930 | - | 0.794 | 0.998 | 0.998 | 0.997 | 0.736 | 0.995 | 0.846 | 0.614 | 0.449 | 0.947 | 0.695 | 0.614 | - | 0.908 | 0.982 | - | 0.997 | 0.947 |
| **110** | **slope** | 0.000 | 0.127 | 0.000 | 0.045 | 1.000 | 0.918 | 0.891 | 0.082 | 0.891 | 0.127 | 0.000 | 0.127 | 1.102 | 0.109 | 0.000 | 0.000 | 0.218 | 0.327 | 0.000 | 0.864 | 0.173 |
|  | **r2** | - | 0.700 | - | 0.250 | 1.000 | 0.990 | 0.990 | 0.450 | 0.990 | 0.700 | - | 0.700 | 0.785 | 0.600 | - | - | 0.847 | 0.939 | - | 0.992 | 0.785 |

**SI5-Duration of soil Eh measurements to reach a stabilized value, considering 102 records.**


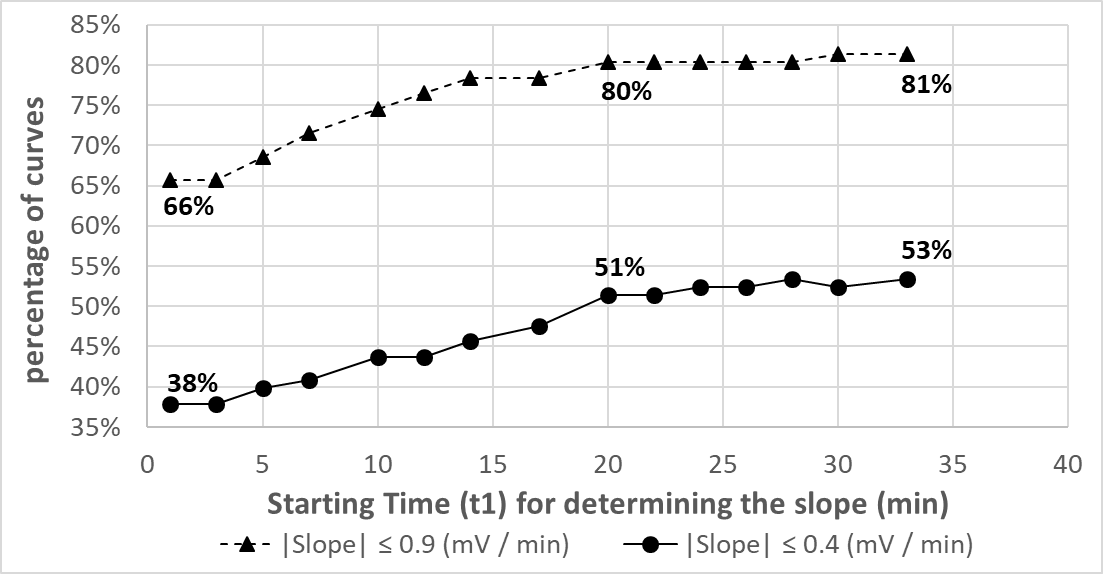


Figure SI5-1 : Duration of soil Eh measurements to reach a stabilized value, considering 102 records.

The experiment was repeated 34 times on three replicates, providing 102 recordings of the soil Eh measurements. The total recording time of the Eh measurements was reduced from 120 min to 40 min. Absolute values of all slopes are reported in Table SI5-1. Figure SI5-1 shows the percentage of curves with a drift less than or equal to 0.4 and 0.9 mV.min-1. In both cases, the percentage of curves with a drift lower than 0.4 mV.min-1 and 0.9 mV.min-1 increased significantly during 0 to 20 min in the monitoring period, and no notable changes were visible after 20 min. Thus, after a stabilization period of 20 min, 51 % of the measurements had a drift ≤ 0.4 mV.min-1. Measurements taken after this period could be considered stable and 80 % of measurement after 20mins illustrated a drift ≤ 0.9 mV.min-1 which was stable.

Table SI5-1 : 40 min x 102 curves

| **t1 starting time ** | **Pot ** | S0a-1 | S0b-1 | S0c-1 | S0a-2 | S0b-2 | S0c-2 | S0a-3 | S0b-3 | S0c-3 | S0a-4 | S0b-4 | S0c-4 | S0a-5 | S0b-5 | S0c-5 | S0a-6 | S0b-6 | S0c-6 | S0a-7 | S0b-7 |
| --- | --- | --- | --- | --- | --- | --- | --- | --- | --- | --- | --- | --- | --- | --- | --- | --- | --- | --- | --- | --- | --- |
| **1** | **slope** | 0.395 | 0.580 | 0.816 | 1.017 | 1.473 | 1.196 | 0.281 | 1.155 | 0.032 | 0.409 | 0.117 | 1.416 | 0.935 | 1.150 | 1.071 | 0.714 | 0.076 | 0.879 | 0.818 | 0.227 |
|  | **r2** | 0.975 | 0.918 | 0.833 | 0.946 | 0.971 | 0.961 | 0.801 | 0.956 | 0.401 | 0.931 | 0.925 | 0.818 | 0.974 | 0.908 | 0.993 | 0.937 | 0.172 | 0.931 | 0.933 | 0.902 |
| **3** | **slope** | 0.384 | 0.532 | 0.921 | 0.975 | 1.435 | 1.148 | 0.238 | 1.089 | 0.038 | 0.382 | 0.112 | 1.224 | 0.974 | 1.079 | 1.066 | 0.669 | 0.044 | 0.825 | 0.754 | 0.212 |
|  | **r2** | 0.976 | 0.939 | 0.918 | 0.944 | 0.969 | 0.963 | 0.855 | 0.966 | 0.482 | 0.939 | 0.926 | 0.852 | 0.983 | 0.905 | 0.992 | 0.945 | 0.071 | 0.936 | 0.955 | 0.902 |
| **5** | **slope** | 0.374 | 0.494 | 0.998 | 0.929 | 1.374 | 1.099 | 0.208 | 1.037 | 0.049 | 0.359 | 0.107 | 1.068 | 1.009 | 1.000 | 1.054 | 0.623 | 0.019 | 0.775 | 0.720 | 0.196 |
|  | **r2** | 0.975 | 0.953 | 0.953 | 0.943 | 0.973 | 0.965 | 0.889 | 0.972 | 0.728 | 0.946 | 0.919 | 0.889 | 0.990 | 0.908 | 0.992 | 0.958 | 0.013 | 0.941 | 0.961 | 0.905 |
| **7** | **slope** | 0.364 | 0.464 | 1.061 | 0.877 | 1.314 | 1.051 | 0.185 | 0.991 | 0.053 | 0.339 | 0.103 | 0.949 | 1.030 | 0.922 | 1.035 | 0.585 | 0.006 | 0.725 | 0.695 | 0.181 |
|  | **r2** | 0.974 | 0.963 | 0.972 | 0.945 | 0.978 | 0.967 | 0.925 | 0.977 | 0.744 | 0.948 | 0.916 | 0.921 | 0.991 | 0.912 | 0.992 | 0.971 | 0.002 | 0.947 | 0.958 | 0.908 |
| **10** | **slope** | 0.346 | 0.431 | 1.135 | 0.791 | 1.239 | 0.986 | 0.164 | 0.934 | 0.060 | 0.307 | 0.098 | 0.818 | 1.046 | 0.808 | 1.010 | 0.546 | 0.041 | 0.656 | 0.627 | 0.163 |
|  | **r2** | 0.974 | 0.968 | 0.985 | 0.957 | 0.983 | 0.968 | 0.940 | 0.981 | 0.767 | 0.961 | 0.890 | 0.960 | 0.989 | 0.924 | 0.992 | 0.976 | 0.054 | 0.958 | 0.978 | 0.900 |
| **12** | **slope** | 0.333 | 0.409 | 1.179 | 0.737 | 1.188 | 0.940 | 0.156 | 0.899 | 0.065 | 0.292 | 0.090 | 0.760 | 1.062 | 0.737 | 0.990 | 0.521 | 0.056 | 0.617 | 0.595 | 0.148 |
|  | **r2** | 0.973 | 0.972 | 0.991 | 0.967 | 0.987 | 0.970 | 0.934 | 0.984 | 0.778 | 0.962 | 0.883 | 0.975 | 0.988 | 0.935 | 0.992 | 0.980 | 0.083 | 0.964 | 0.986 | 0.904 |
| **14** | **slope** | 0.320 | 0.389 | 1.220 | 0.692 | 1.148 | 0.891 | 0.147 | 0.866 | 0.070 | 0.277 | 0.092 | 0.715 | 1.092 | 0.675 | 0.969 | 0.501 | 0.068 | 0.579 | 0.578 | 0.137 |
|  | **r2** | 0.973 | 0.975 | 0.995 | 0.976 | 0.989 | 0.974 | 0.934 | 0.986 | 0.784 | 0.963 | 0.866 | 0.985 | 0.990 | 0.945 | 0.992 | 0.982 | 0.100 | 0.972 | 0.986 | 0.892 |
| **17** | **slope** | 0.303 | 0.365 | 1.265 | 0.640 | 1.098 | 0.822 | 0.139 | 0.822 | 0.078 | 0.257 | 0.090 | 0.675 | 1.054 | 0.601 | 0.939 | 0.469 | 0.088 | 0.533 | 0.547 | 0.120 |
|  | **r2** | 0.969 | 0.975 | 0.998 | 0.983 | 0.991 | 0.979 | 0.923 | 0.988 | 0.778 | 0.960 | 0.814 | 0.988 | 0.994 | 0.951 | 0.991 | 0.986 | 0.118 | 0.977 | 0.988 | 0.880 |
| **20** | **slope** | 0.288 | 0.340 | 1.291 | 0.597 | 1.057 | 0.762 | 0.135 | 0.784 | 0.083 | 0.243 | 0.071 | 0.635 | 1.009 | 0.532 | 0.901 | 0.444 | 0.103 | 0.501 | 0.529 | 0.114 |
|  | **r2** | 0.960 | 0.980 | 0.998 | 0.987 | 0.990 | 0.984 | 0.888 | 0.987 | 0.735 | 0.950 | 0.750 | 0.992 | 0.996 | 0.955 | 0.991 | 0.988 | 0.109 | 0.974 | 0.987 | 0.852 |
| **22** | **slope** | 0.272 | 0.332 | 1.298 | 0.577 | 1.047 | 0.730 | 0.135 | 0.754 | 0.082 | 0.232 | 0.077 | 0.616 | 0.991 | 0.484 | 0.860 | 0.437 | 0.075 | 0.468 | 0.511 | 0.109 |
|  | **r2** | 0.958 | 0.978 | 0.998 | 0.987 | 0.987 | 0.983 | 0.882 | 0.988 | 0.669 | 0.943 | 0.733 | 0.993 | 0.997 | 0.963 | 0.995 | 0.985 | 0.048 | 0.980 | 0.986 | 0.801 |
| **24** | **slope** | 0.262 | 0.331 | 1.284 | 0.556 | 1.071 | 0.694 | 0.147 | 0.721 | 0.074 | 0.213 | 0.081 | 0.615 | 0.983 | 0.441 | 0.841 | 0.429 | 0.029 | 0.456 | 0.500 | 0.088 |
|  | **r2** | 0.950 | 0.974 | 0.998 | 0.987 | 0.984 | 0.984 | 0.882 | 0.989 | 0.551 | 0.933 | 0.688 | 0.991 | 0.996 | 0.971 | 0.995 | 0.982 | 0.007 | 0.974 | 0.983 | 0.750 |
| **26** | **slope** | 0.243 | 0.321 | 1.282 | 0.536 | 1.111 | 0.657 | 0.154 | 0.686 | 0.046 | 0.211 | 0.079 | 0.600 | 0.968 | 0.421 | 0.821 | 0.421 | 0.179 | 0.436 | 0.479 | 0.096 |
|  | **r2** | 0.938 | 0.964 | 0.997 | 0.985 | 0.982 | 0.984 | 0.854 | 0.990 | 0.348 | 0.905 | 0.589 | 0.988 | 0.995 | 0.964 | 0.994 | 0.976 | 0.237 | 0.968 | 0.982 | 0.723 |
| **28** | **slope** | 0.242 | 0.330 | 1.269 | 0.527 | 1.181 | 0.632 | 0.143 | 0.659 | 0.060 | 0.209 | 0.060 | 0.593 | 0.940 | 0.390 | 0.808 | 0.418 | 0.401 | 0.401 | 0.473 | 0.099 |
|  | **r2** | 0.910 | 0.952 | 0.996 | 0.980 | 0.986 | 0.978 | 0.779 | 0.989 | 0.393 | 0.889 | 0.393 | 0.985 | 0.994 | 0.958 | 0.992 | 0.968 | 0.906 | 0.966 | 0.975 | 0.643 |
| **30** | **slope** | 0.236 | 0.327 | 1.236 | 0.500 | 1.264 | 0.600 | 0.136 | 0.673 | 0.082 | 0.218 | 0.000 | 0.609 | 1.000 | 0.400 | 0.818 | 0.427 | 0.410 | 0.410 | 0.464 | 0.082 |
|  | **r2** | 0.889 | 0.939 | 0.995 | 0.976 | 0.993 | 0.972 | 0.750 | 0.985 | 0.450 | 0.847 | - | 0.980 | 1.000 | 0.940 | 0.988 | 0.960 | 0.857 | 0.949 | 0.963 | 0.450 |
| **33** | **slope** | 0.190 | 0.321 | 1.190 | 0.476 | 1.333 | 0.560 | 0.179 | 0.679 | 0.143 | 0.179 | 0.000 | 0.583 | 1.000 | 0.410 | 0.821 | 0.405 | 0.405 | 0.405 | 0.417 | 0.000 |
|  | **r2** | 0.762 | 0.890 | 0.992 | 0.952 | 0.989 | 0.948 | 0.714 | 0.973 | 0.571 | 0.714 | - | 0.961 | 1.000 | 0.890 | 0.981 | 0.917 | 0.724 | 0.917 | 0.926 | - |

| **t1 starting time ** | **Pot ** | S0c-7 | S0a-8 | S0b-8 | S0c-8 | S0a-9 | S0b-9 | S0c-9 | S0a-10 | S0b-10 | S0c-10 | S0a-11 | S0b-11 | S0c-11 | S0a-12 | S0b-12 | S0c-12 | S0a-13 | S0b-13 | S0c-13 | S0a-14 |
| --- | --- | --- | --- | --- | --- | --- | --- | --- | --- | --- | --- | --- | --- | --- | --- | --- | --- | --- | --- | --- | --- |
| **1** | **slope** | 0.052 | 0.026 | 11.917 | 2.656 | 0.397 | 0.997 | 0.024 | 0.509 | 0.260 | 2.309 | 0.275 | 0.124 | 0.434 | 0.515 | 0.531 | 0.431 | 0.769 | 0.532 | 0.722 | 0.230 |
|  | **r2** | 0.734 | 0.438 | 0.850 | 0.997 | 0.976 | 0.917 | 0.012 | 0.884 | 0.941 | 0.965 | 0.876 | 0.956 | 0.958 | 0.994 | 0.997 | 0.979 | 0.901 | 0.959 | 0.951 | 0.982 |
| **3** | **slope** | 0.048 | 0.025 | 10.484 | 2.655 | 0.377 | 0.922 | 0.085 | 0.506 | 0.243 | 2.194 | 0.250 | 0.120 | 0.409 | 0.525 | 0.534 | 0.414 | 0.708 | 0.503 | 0.686 | 0.223 |
|  | **r2** | 0.691 | 0.373 | 0.883 | 0.996 | 0.989 | 0.929 | 0.212 | 0.918 | 0.952 | 0.973 | 0.887 | 0.955 | 0.968 | 0.997 | 0.997 | 0.986 | 0.909 | 0.968 | 0.955 | 0.985 |
| **5** | **slope** | 0.042 | 0.022 | 9.331 | 2.646 | 0.367 | 0.854 | 0.133 | 0.505 | 0.231 | 2.097 | 0.230 | 0.121 | 0.388 | 0.528 | 0.533 | 0.402 | 0.650 | 0.479 | 0.653 | 0.219 |
|  | **r2** | 0.651 | 0.292 | 0.914 | 0.995 | 0.991 | 0.941 | 0.524 | 0.941 | 0.957 | 0.979 | 0.889 | 0.949 | 0.979 | 0.997 | 0.997 | 0.989 | 0.921 | 0.975 | 0.958 | 0.983 |
| **7** | **slope** | 0.037 | 0.017 | 8.463 | 2.630 | 0.367 | 0.796 | 0.170 | 0.502 | 0.219 | 2.014 | 0.207 | 0.121 | 0.371 | 0.532 | 0.531 | 0.393 | 0.599 | 0.457 | 0.626 | 0.220 |
|  | **r2** | 0.623 | 0.194 | 0.937 | 0.995 | 0.990 | 0.951 | 0.743 | 0.958 | 0.961 | 0.984 | 0.902 | 0.940 | 0.985 | 0.996 | 0.997 | 0.990 | 0.932 | 0.983 | 0.957 | 0.981 |
| **10** | **slope** | 0.034 | 0.006 | 7.503 | 2.606 | 0.372 | 0.720 | 0.214 | 0.498 | 0.207 | 1.910 | 0.182 | 0.113 | 0.357 | 0.538 | 0.530 | 0.381 | 0.535 | 0.432 | 0.581 | 0.217 |
|  | **r2** | 0.525 | 0.029 | 0.958 | 0.993 | 0.989 | 0.966 | 0.900 | 0.977 | 0.958 | 0.988 | 0.907 | 0.930 | 0.986 | 0.996 | 0.996 | 0.992 | 0.943 | 0.989 | 0.958 | 0.977 |
| **12** | **slope** | 0.030 | 0.007 | 7.020 | 2.584 | 0.376 | 0.681 | 0.232 | 0.508 | 0.197 | 1.856 | 0.166 | 0.115 | 0.349 | 0.537 | 0.531 | 0.378 | 0.496 | 0.420 | 0.548 | 0.216 |
|  | **r2** | 0.429 | 0.100 | 0.967 | 0.992 | 0.988 | 0.971 | 0.923 | 0.981 | 0.958 | 0.990 | 0.915 | 0.921 | 0.985 | 0.996 | 0.996 | 0.991 | 0.951 | 0.990 | 0.961 | 0.973 |
| **14** | **slope** | 0.022 | 0.008 | 6.618 | 2.548 | 0.379 | 0.650 | 0.250 | 0.498 | 0.192 | 1.797 | 0.153 | 0.114 | 0.342 | 0.534 | 0.532 | 0.377 | 0.463 | 0.413 | 0.515 | 0.215 |
|  | **r2** | 0.297 | 0.107 | 0.972 | 0.991 | 0.986 | 0.972 | 0.944 | 0.985 | 0.949 | 0.992 | 0.916 | 0.903 | 0.983 | 0.995 | 0.995 | 0.989 | 0.958 | 0.989 | 0.965 | 0.970 |
| **17** | **slope** | 0.000 | 0.010 | 6.081 | 2.469 | 0.387 | 0.600 | 0.278 | 0.503 | 0.185 | 1.723 | 0.147 | 0.103 | 0.329 | 0.530 | 0.528 | 0.370 | 0.417 | 0.399 | 0.470 | 0.212 |
|  | **r2** | - | 0.120 | 0.979 | 0.990 | 0.984 | 0.976 | 0.968 | 0.987 | 0.936 | 0.994 | 0.892 | 0.875 | 0.981 | 0.994 | 0.994 | 0.986 | 0.966 | 0.988 | 0.971 | 0.959 |
| **20** | **slope** | 0.000 | 0.013 | 5.603 | 2.358 | 0.396 | 0.548 | 0.299 | 0.494 | 0.175 | 1.652 | 0.130 | 0.110 | 0.317 | 0.527 | 0.525 | 0.366 | 0.384 | 0.392 | 0.434 | 0.223 |
|  | **r2** | - | 0.136 | 0.986 | 0.990 | 0.981 | 0.984 | 0.974 | 0.987 | 0.917 | 0.996 | 0.852 | 0.857 | 0.977 | 0.992 | 0.991 | 0.981 | 0.966 | 0.985 | 0.971 | 0.954 |
| **22** | **slope** | 0.000 | 0.016 | 5.335 | 2.270 | 0.409 | 0.521 | 0.298 | 0.493 | 0.172 | 1.614 | 0.132 | 0.111 | 0.314 | 0.525 | 0.514 | 0.358 | 0.361 | 0.389 | 0.412 | 0.218 |
|  | **r2** | - | 0.150 | 0.988 | 0.991 | 0.980 | 0.986 | 0.965 | 0.988 | 0.889 | 0.996 | 0.815 | 0.817 | 0.973 | 0.990 | 0.990 | 0.978 | 0.965 | 0.981 | 0.968 | 0.939 |
| **24** | **slope** | 0.000 | 0.020 | 5.103 | 2.172 | 0.417 | 0.515 | 0.316 | 0.496 | 0.150 | 1.578 | 0.123 | 0.100 | 0.304 | 0.517 | 0.517 | 0.355 | 0.331 | 0.395 | 0.380 | 0.233 |
|  | **r2** | - | 0.167 | 0.989 | 0.994 | 0.977 | 0.982 | 0.968 | 0.990 | 0.871 | 0.996 | 0.744 | 0.745 | 0.965 | 0.988 | 0.988 | 0.973 | 0.974 | 0.978 | 0.974 | 0.940 |
| **26** | **slope** | 0.000 | 0.025 | 4.861 | 2.071 | 0.414 | 0.500 | 0.314 | 0.504 | 0.146 | 1.557 | 0.089 | 0.096 | 0.307 | 0.500 | 0.521 | 0.339 | 0.321 | 0.389 | 0.361 | 0.236 |
|  | **r2** | - | 0.188 | 0.991 | 0.998 | 0.969 | 0.976 | 0.956 | 0.989 | 0.819 | 0.995 | 0.670 | 0.723 | 0.952 | 0.987 | 0.984 | 0.967 | 0.964 | 0.970 | 0.969 | 0.919 |
| **28** | **slope** | 0.000 | 0.033 | 4.632 | 2.000 | 0.423 | 0.467 | 0.341 | 0.508 | 0.115 | 1.500 | 0.082 | 0.115 | 0.302 | 0.500 | 0.527 | 0.330 | 0.330 | 0.396 | 0.341 | 0.242 |
|  | **r2** | - | 0.214 | 0.992 | 1.000 | 0.958 | 0.974 | 0.960 | 0.984 | 0.750 | 0.996 | 0.536 | 0.750 | 0.939 | 0.983 | 0.980 | 0.952 | 0.952 | 0.959 | 0.960 | 0.910 |
| **30** | **slope** | 0.000 | 0.045 | 4.373 | 2.000 | 0.410 | 0.455 | 0.327 | 0.498 | 0.127 | 1.473 | 0.045 | 0.136 | 0.282 | 0.500 | 0.536 | 0.410 | 0.327 | 0.410 | 0.327 | 0.264 |
|  | **r2** | - | 0.250 | 0.994 | 1.000 | 0.940 | 0.962 | 0.939 | 0.980 | 0.700 | 0.994 | 0.250 | 0.750 | 0.907 | 0.976 | 0.972 | 0.938 | 0.939 | 0.944 | 0.939 | 0.895 |
| **33** | **slope** | 0.000 | 0.083 | 4.000 | 2.000 | 0.321 | 0.440 | 0.321 | 0.494 | 0.083 | 1.405 | 0.000 | 0.143 | 0.274 | 0.476 | 0.583 | 0.410 | 0.321 | 0.321 | 0.321 | 0.262 |
|  | **r2** | - | 0.333 | 0.997 | 1.000 | 0.890 | 0.918 | 0.890 | 0.964 | 0.333 | 0.993 | - | 0.571 | 0.813 | 0.952 | 0.961 | 0.893 | 0.890 | 0.890 | 0.890 | 0.823 |

| **t1 starting time ** | **Pot ** | S0b-14 | S0c-14 | S0a-15 | S0b-15 | S0c-15 | S0a-16 | S0b-16 | S0c-16 | S0a-17 | S0b-17 | S0c-17 | S0a-18 | S0b-18 | S0c-18 | S0a-19 | S0b-19 | S0c-19 | S0a-20 | S0b-20 | S0c-20 |
| --- | --- | --- | --- | --- | --- | --- | --- | --- | --- | --- | --- | --- | --- | --- | --- | --- | --- | --- | --- | --- | --- |
| **1** | **slope** | 0.213 | 1.097 | 2.192 | 0.123 | 1.445 | 0.140 | 0.928 | 0.222 | 1.151 | 0.315 | 1.442 | 0.193 | 0.109 | 0.697 | 1.579 | 0.255 | 1.471 | 0.542 | 0.680 | 1.074 |
|  | **r2** | 0.981 | 0.929 | 0.978 | 0.134 | 0.995 | 0.845 | 0.821 | 0.514 | 0.808 | 0.936 | 0.936 | 0.925 | 0.725 | 0.975 | 0.961 | 0.878 | 0.942 | 0.881 | 0.885 | 0.889 |
| **3** | **slope** | 0.211 | 1.032 | 2.258 | 0.018 | 1.469 | 0.155 | 0.802 | 0.231 | 0.971 | 0.292 | 1.347 | 0.181 | 0.093 | 0.717 | 1.655 | 0.232 | 1.398 | 0.490 | 0.611 | 0.997 |
|  | **r2** | 0.980 | 0.931 | 0.982 | 0.010 | 0.997 | 0.910 | 0.859 | 0.499 | 0.876 | 0.953 | 0.948 | 0.932 | 0.718 | 0.978 | 0.972 | 0.886 | 0.944 | 0.898 | 0.912 | 0.887 |
| **5** | **slope** | 0.208 | 0.968 | 2.314 | 0.041 | 1.487 | 0.169 | 0.706 | 0.263 | 0.857 | 0.276 | 1.263 | 0.170 | 0.079 | 0.741 | 1.716 | 0.211 | 1.323 | 0.448 | 0.558 | 0.916 |
|  | **r2** | 0.976 | 0.936 | 0.983 | 0.099 | 0.997 | 0.946 | 0.890 | 0.554 | 0.915 | 0.960 | 0.958 | 0.938 | 0.704 | 0.983 | 0.978 | 0.894 | 0.946 | 0.908 | 0.930 | 0.889 |
| **7** | **slope** | 0.206 | 0.906 | 2.364 | 0.079 | 1.503 | 0.178 | 0.635 | 0.319 | 0.778 | 0.263 | 1.190 | 0.162 | 0.068 | 0.764 | 1.768 | 0.194 | 1.250 | 0.408 | 0.516 | 0.837 |
|  | **r2** | 0.974 | 0.941 | 0.984 | 0.411 | 0.998 | 0.964 | 0.909 | 0.687 | 0.937 | 0.963 | 0.967 | 0.937 | 0.664 | 0.986 | 0.981 | 0.896 | 0.949 | 0.923 | 0.943 | 0.892 |
| **10** | **slope** | 0.200 | 0.816 | 2.411 | 0.121 | 1.520 | 0.181 | 0.547 | 0.395 | 0.692 | 0.244 | 1.103 | 0.152 | 0.052 | 0.795 | 1.853 | 0.168 | 1.142 | 0.364 | 0.465 | 0.725 |
|  | **r2** | 0.969 | 0.951 | 0.981 | 0.755 | 0.997 | 0.955 | 0.937 | 0.853 | 0.958 | 0.970 | 0.974 | 0.929 | 0.595 | 0.990 | 0.985 | 0.909 | 0.955 | 0.929 | 0.956 | 0.899 |
| **12** | **slope** | 0.202 | 0.766 | 2.407 | 0.139 | 1.536 | 0.176 | 0.501 | 0.376 | 0.645 | 0.234 | 1.050 | 0.145 | 0.038 | 0.815 | 1.911 | 0.154 | 1.070 | 0.341 | 0.436 | 0.660 |
|  | **r2** | 0.963 | 0.955 | 0.977 | 0.836 | 0.998 | 0.947 | 0.950 | 0.824 | 0.969 | 0.969 | 0.979 | 0.917 | 0.550 | 0.992 | 0.988 | 0.910 | 0.961 | 0.925 | 0.961 | 0.901 |
| **14** | **slope** | 0.197 | 0.715 | 2.369 | 0.163 | 1.551 | 0.181 | 0.467 | 0.334 | 0.614 | 0.230 | 1.004 | 0.139 | 0.034 | 0.835 | 1.966 | 0.145 | 1.005 | 0.313 | 0.413 | 0.590 |
|  | **r2** | 0.955 | 0.961 | 0.972 | 0.936 | 0.997 | 0.942 | 0.955 | 0.799 | 0.971 | 0.963 | 0.983 | 0.908 | 0.453 | 0.993 | 0.990 | 0.894 | 0.966 | 0.930 | 0.963 | 0.912 |
| **17** | **slope** | 0.190 | 0.647 | 2.240 | 0.176 | 1.577 | 0.179 | 0.423 | 0.248 | 0.564 | 0.219 | 0.944 | 0.129 | 0.019 | 0.867 | 2.052 | 0.132 | 0.918 | 0.273 | 0.380 | 0.505 |
|  | **r2** | 0.944 | 0.969 | 0.967 | 0.939 | 0.998 | 0.919 | 0.958 | 0.848 | 0.976 | 0.955 | 0.986 | 0.873 | 0.230 | 0.995 | 0.993 | 0.869 | 0.972 | 0.935 | 0.962 | 0.919 |
| **20** | **slope** | 0.179 | 0.597 | 2.040 | 0.179 | 1.613 | 0.162 | 0.382 | 0.212 | 0.521 | 0.213 | 0.888 | 0.119 | 0.000 | 0.892 | 2.134 | 0.116 | 0.838 | 0.245 | 0.351 | 0.426 |
|  | **r2** | 0.931 | 0.971 | 0.968 | 0.918 | 0.998 | 0.899 | 0.958 | 0.798 | 0.979 | 0.940 | 0.989 | 0.836 | - | 0.996 | 0.995 | 0.837 | 0.979 | 0.923 | 0.957 | 0.926 |
| **22** | **slope** | 0.174 | 0.565 | 1.879 | 0.184 | 1.630 | 0.151 | 0.353 | 0.237 | 0.507 | 0.198 | 0.854 | 0.109 | 0.000 | 0.911 | 2.188 | 0.109 | 0.784 | 0.228 | 0.321 | 0.374 |
|  | **r2** | 0.908 | 0.969 | 0.977 | 0.914 | 0.998 | 0.868 | 0.961 | 0.821 | 0.974 | 0.929 | 0.990 | 0.781 | - | 0.997 | 0.996 | 0.781 | 0.985 | 0.909 | 0.964 | 0.939 |
| **24** | **slope** | 0.169 | 0.520 | 1.750 | 0.201 | 1.650 | 0.137 | 0.333 | 0.240 | 0.480 | 0.199 | 0.828 | 0.100 | 0.000 | 0.907 | 2.248 | 0.086 | 0.750 | 0.199 | 0.306 | 0.333 |
|  | **r2** | 0.894 | 0.975 | 0.982 | 0.922 | 0.998 | 0.848 | 0.954 | 0.773 | 0.971 | 0.905 | 0.989 | 0.745 | - | 0.995 | 0.997 | 0.729 | 0.985 | 0.905 | 0.955 | 0.944 |
| **26** | **slope** | 0.171 | 0.486 | 1.639 | 0.211 | 1.671 | 0.125 | 0.314 | 0.279 | 0.461 | 0.175 | 0.796 | 0.104 | 0.000 | 0.911 | 2.311 | 0.089 | 0.711 | 0.175 | 0.300 | 0.304 |
|  | **r2** | 0.857 | 0.975 | 0.985 | 0.905 | 0.998 | 0.781 | 0.943 | 0.795 | 0.963 | 0.881 | 0.988 | 0.683 | - | 0.994 | 0.998 | 0.670 | 0.985 | 0.881 | 0.936 | 0.935 |
| **28** | **slope** | 0.148 | 0.456 | 1.533 | 0.198 | 1.692 | 0.115 | 0.302 | 0.319 | 0.423 | 0.176 | 0.758 | 0.093 | 0.000 | 0.934 | 2.357 | 0.082 | 0.670 | 0.176 | 0.275 | 0.269 |
|  | **r2** | 0.789 | 0.972 | 0.989 | 0.857 | 0.998 | 0.750 | 0.923 | 0.796 | 0.958 | 0.831 | 0.987 | 0.543 | - | 0.992 | 0.998 | 0.536 | 0.984 | 0.831 | 0.920 | 0.922 |
| **30** | **slope** | 0.173 | 0.445 | 1.436 | 0.236 | 1.700 | 0.127 | 0.264 | 0.291 | 0.410 | 0.136 | 0.718 | 0.045 | 0.000 | 0.955 | 2.391 | 0.045 | 0.645 | 0.136 | 0.264 | 0.236 |
|  | **r2** | 0.785 | 0.960 | 0.991 | 0.889 | 0.997 | 0.700 | 0.895 | 0.721 | 0.940 | 0.750 | 0.984 | 0.250 | - | 0.993 | 0.998 | 0.250 | 0.977 | 0.750 | 0.895 | 0.889 |
| **33** | **slope** | 0.167 | 0.405 | 1.345 | 0.262 | 1.714 | 0.083 | 0.262 | 0.250 | 0.410 | 0.143 | 0.726 | 0.083 | 0.000 | 0.917 | 2.476 | 0.000 | 0.583 | 0.143 | 0.262 | 0.190 |
|  | **r2** | 0.583 | 0.917 | 0.989 | 0.823 | 0.995 | 0.333 | 0.823 | 0.447 | 0.890 | 0.571 | 0.968 | 0.333 | - | 0.984 | 0.998 | - | 0.961 | 0.571 | 0.823 | 0.762 |

| **t1 starting time ** | **Pot ** | S0a-21 | S0b-21 | S0c-21 | S0a-22 | S0b-22 | S0c-22 | S0a-23 | S0b-23 | S0c-23 | S0a-24 | S0b-24 | S0c-24 | S0a-25 | S0b-25 | S0c-25 | S0a-26 | S0b-26 | S0c-26 | S0a-27 | S0b-27 |
| --- | --- | --- | --- | --- | --- | --- | --- | --- | --- | --- | --- | --- | --- | --- | --- | --- | --- | --- | --- | --- | --- |
| **1** | **slope** | 0.114 | 0.682 | 0.424 | 1.155 | 1.031 | 2.177 | 0.380 | 0.110 | 0.041 | 0.342 | 1.640 | 0.810 | 1.288 | 0.668 | 0.012 | 0.184 | 0.021 | 0.497 | 3.401 | 0.485 |
|  | **r2** | 0.161 | 0.872 | 0.969 | 0.832 | 0.983 | 0.999 | 0.882 | 0.205 | 0.239 | 0.942 | 0.996 | 0.904 | 0.989 | 0.867 | 0.017 | 0.883 | 0.029 | 0.940 | 0.980 | 0.835 |
| **3** | **slope** | 0.181 | 0.608 | 0.448 | 1.000 | 1.068 | 2.189 | 0.342 | 0.040 | 0.024 | 0.321 | 1.675 | 0.731 | 1.299 | 0.594 | 0.016 | 0.182 | 0.058 | 0.495 | 3.506 | 0.541 |
|  | **r2** | 0.410 | 0.899 | 0.986 | 0.877 | 0.990 | 0.999 | 0.905 | 0.075 | 0.120 | 0.952 | 0.998 | 0.937 | 0.988 | 0.899 | 0.058 | 0.865 | 0.373 | 0.942 | 0.984 | 0.901 |
| **5** | **slope** | 0.235 | 0.550 | 0.461 | 0.890 | 1.093 | 2.202 | 0.312 | 0.004 | 0.009 | 0.305 | 1.695 | 0.676 | 1.318 | 0.539 | 0.035 | 0.177 | 0.079 | 0.494 | 3.596 | 0.588 |
|  | **r2** | 0.607 | 0.923 | 0.991 | 0.904 | 0.993 | 0.999 | 0.919 | 0.001 | 0.023 | 0.955 | 0.999 | 0.954 | 0.988 | 0.916 | 0.335 | 0.842 | 0.625 | 0.945 | 0.986 | 0.938 |
| **7** | **slope** | 0.283 | 0.506 | 0.470 | 0.805 | 1.115 | 2.216 | 0.286 | 0.036 | 0.007 | 0.288 | 1.708 | 0.633 | 1.342 | 0.494 | 0.044 | 0.166 | 0.095 | 0.505 | 3.665 | 0.629 |
|  | **r2** | 0.745 | 0.936 | 0.992 | 0.925 | 0.994 | 0.999 | 0.932 | 0.211 | 0.019 | 0.962 | 0.999 | 0.965 | 0.988 | 0.928 | 0.449 | 0.816 | 0.775 | 0.949 | 0.986 | 0.961 |
| **10** | **slope** | 0.345 | 0.452 | 0.481 | 0.708 | 1.144 | 2.237 | 0.255 | 0.067 | 0.022 | 0.269 | 1.723 | 0.587 | 1.394 | 0.440 | 0.063 | 0.152 | 0.117 | 0.499 | 3.718 | 0.684 |
|  | **r2** | 0.855 | 0.952 | 0.992 | 0.943 | 0.996 | 0.999 | 0.946 | 0.642 | 0.191 | 0.963 | 1.000 | 0.972 | 0.991 | 0.941 | 0.704 | 0.759 | 0.909 | 0.955 | 0.984 | 0.982 |
| **12** | **slope** | 0.388 | 0.420 | 0.487 | 0.653 | 1.159 | 2.235 | 0.240 | 0.076 | 0.038 | 0.257 | 1.726 | 0.559 | 1.433 | 0.408 | 0.073 | 0.138 | 0.122 | 0.504 | 3.703 | 0.717 |
|  | **r2** | 0.911 | 0.962 | 0.991 | 0.955 | 0.996 | 0.999 | 0.948 | 0.694 | 0.550 | 0.964 | 0.999 | 0.976 | 0.994 | 0.948 | 0.822 | 0.710 | 0.904 | 0.961 | 0.980 | 0.991 |
| **14** | **slope** | 0.421 | 0.392 | 0.496 | 0.610 | 1.175 | 2.233 | 0.226 | 0.087 | 0.043 | 0.247 | 1.722 | 0.531 | 1.470 | 0.382 | 0.078 | 0.122 | 0.124 | 0.504 | 3.647 | 0.741 |
|  | **r2** | 0.934 | 0.971 | 0.991 | 0.960 | 0.996 | 0.998 | 0.949 | 0.756 | 0.577 | 0.962 | 0.999 | 0.981 | 0.996 | 0.950 | 0.816 | 0.643 | 0.889 | 0.968 | 0.976 | 0.995 |
| **17** | **slope** | 0.471 | 0.360 | 0.506 | 0.552 | 1.204 | 2.225 | 0.210 | 0.075 | 0.052 | 0.240 | 1.719 | 0.499 | 1.508 | 0.342 | 0.082 | 0.091 | 0.119 | 0.503 | 3.474 | 0.762 |
|  | **r2** | 0.961 | 0.977 | 0.990 | 0.970 | 0.996 | 0.998 | 0.940 | 0.654 | 0.621 | 0.950 | 0.999 | 0.983 | 0.997 | 0.956 | 0.781 | 0.501 | 0.844 | 0.976 | 0.970 | 0.996 |
| **20** | **slope** | 0.513 | 0.336 | 0.518 | 0.508 | 1.236 | 2.191 | 0.194 | 0.052 | 0.064 | 0.223 | 1.705 | 0.471 | 1.547 | 0.303 | 0.079 | 0.058 | 0.139 | 0.499 | 3.212 | 0.778 |
|  | **r2** | 0.971 | 0.977 | 0.989 | 0.970 | 0.997 | 0.997 | 0.926 | 0.545 | 0.668 | 0.938 | 0.999 | 0.983 | 0.998 | 0.966 | 0.695 | 0.285 | 0.877 | 0.982 | 0.968 | 0.996 |
| **22** | **slope** | 0.539 | 0.323 | 0.537 | 0.477 | 1.258 | 2.153 | 0.184 | 0.042 | 0.074 | 0.205 | 1.696 | 0.453 | 1.561 | 0.284 | 0.068 | 0.023 | 0.153 | 0.499 | 3.000 | 0.770 |
|  | **r2** | 0.974 | 0.975 | 0.991 | 0.971 | 0.997 | 0.997 | 0.914 | 0.400 | 0.700 | 0.931 | 0.999 | 0.984 | 0.998 | 0.966 | 0.590 | 0.072 | 0.888 | 0.985 | 0.969 | 0.995 |
| **24** | **slope** | 0.561 | 0.314 | 0.544 | 0.444 | 1.275 | 2.113 | 0.174 | 0.020 | 0.086 | 0.199 | 1.684 | 0.444 | 1.583 | 0.270 | 0.064 | 0.000 | 0.164 | 0.496 | 2.787 | 0.777 |
|  | **r2** | 0.973 | 0.967 | 0.989 | 0.974 | 0.997 | 0.997 | 0.883 | 0.167 | 0.729 | 0.905 | 0.999 | 0.979 | 0.998 | 0.958 | 0.542 | - | 0.882 | 0.987 | 0.970 | 0.994 |
| **26** | **slope** | 0.600 | 0.318 | 0.554 | 0.414 | 1.275 | 2.079 | 0.161 | 0.000 | 0.100 | 0.189 | 1.696 | 0.432 | 1.586 | 0.268 | 0.079 | 0.046 | 0.168 | 0.500 | 2.561 | 0.757 |
|  | **r2** | 0.979 | 0.956 | 0.987 | 0.974 | 0.995 | 0.997 | 0.861 | - | 0.750 | 0.885 | 0.999 | 0.973 | 0.998 | 0.942 | 0.589 | 0.348 | 0.845 | 0.988 | 0.973 | 0.992 |
| **28** | **slope** | 0.626 | 0.313 | 0.566 | 0.401 | 1.313 | 2.027 | 0.148 | 0.000 | 0.115 | 0.181 | 1.692 | 0.418 | 1.577 | 0.258 | 0.099 | 0.060 | 0.148 | 0.500 | 2.335 | 0.753 |
|  | **r2** | 0.977 | 0.943 | 0.984 | 0.966 | 0.996 | 0.997 | 0.789 | - | 0.750 | 0.828 | 0.998 | 0.964 | 0.997 | 0.928 | 0.643 | 0.393 | 0.766 | 0.993 | 0.976 | 0.989 |
| **30** | **slope** | 0.664 | 0.291 | 0.582 | 0.391 | 1.336 | 1.955 | 0.136 | 0.000 | 0.127 | 0.173 | 1.700 | 0.410 | 1.536 | 0.236 | 0.127 | 0.082 | 0.182 | 0.498 | 2.100 | 0.745 |
|  | **r2** | 0.976 | 0.914 | 0.980 | 0.953 | 0.994 | 0.998 | 0.750 | - | 0.700 | 0.785 | 0.997 | 0.949 | 0.997 | 0.889 | 0.700 | 0.450 | 0.800 | 0.990 | 0.982 | 0.986 |
| **33** | **slope** | 0.726 | 0.262 | 0.583 | 0.405 | 1.405 | 1.917 | 0.143 | 0.000 | 0.083 | 0.167 | 1.714 | 0.357 | 1.476 | 0.262 | 0.190 | 0.143 | 0.226 | 0.500 | 1.821 | 0.726 |
|  | **r2** | 0.968 | 0.823 | 0.961 | 0.917 | 0.993 | 0.996 | 0.571 | - | 0.333 | 0.583 | 0.995 | 0.893 | 0.995 | 0.823 | 0.762 | 0.571 | 0.747 | 0.981 | 0.982 | 0.968 |

| **t1 starting time ** | **Pot ** | S0c-27 | S0a-28 | S0b-28 | S0c-28 | S0a-29 | S0b-29 | S0c-29 | S0a-30 | S0b-30 | S0c-30 | S0a-31 | S0b-31 | S0c-31 | S0a-32 | S0b-32 | S0c-32 | S0a-33 | S0b-33 | S0c-33 | S0a-34 |
| --- | --- | --- | --- | --- | --- | --- | --- | --- | --- | --- | --- | --- | --- | --- | --- | --- | --- | --- | --- | --- | --- |
| **1** | **slope** | 0.631 | 0.653 | 1.017 | 0.062 | 0.863 | 0.874 | 1.335 | 0.344 | 2.754 | 0.079 | 0.043 | 0.104 | 0.089 | 0.090 | 0.716 | 1.323 | 2.022 | 0.587 | 3.293 | 1.792 |
|  | **r2** | 0.950 | 0.842 | 0.942 | 0.600 | 0.695 | 0.995 | 0.979 | 0.915 | 0.462 | 0.647 | 0.196 | 0.455 | 0.101 | 0.889 | 0.921 | 0.884 | 0.940 | 0.732 | 0.955 | 0.976 |
| **3** | **slope** | 0.597 | 0.594 | 1.070 | 0.076 | 0.858 | 0.886 | 1.276 | 0.311 | 1.713 | 0.097 | 0.015 | 0.067 | 0.009 | 0.085 | 0.653 | 1.181 | 1.918 | 0.470 | 3.192 | 1.896 |
|  | **r2** | 0.957 | 0.836 | 0.956 | 0.793 | 0.660 | 0.995 | 0.989 | 0.961 | 0.535 | 0.872 | 0.064 | 0.523 | 0.017 | 0.889 | 0.952 | 0.918 | 0.942 | 0.819 | 0.951 | 0.999 |
| **5** | **slope** | 0.567 | 0.532 | 1.077 | 0.085 | 0.780 | 0.886 | 1.263 | 0.295 | 1.132 | 0.107 | 0.004 | 0.050 | 0.035 | 0.081 | 0.613 | 1.077 | 1.812 | 0.400 | 3.089 | 1.907 |
|  | **r2** | 0.962 | 0.836 | 0.950 | 0.848 | 0.601 | 0.995 | 0.988 | 0.969 | 0.683 | 0.928 | 0.010 | 0.475 | 0.548 | 0.873 | 0.964 | 0.941 | 0.945 | 0.871 | 0.946 | 0.999 |
| **7** | **slope** | 0.541 | 0.466 | 1.058 | 0.095 | 0.616 | 0.884 | 1.278 | 0.282 | 0.861 | 0.112 | 0.013 | 0.035 | 0.043 | 0.073 | 0.582 | 0.996 | 1.706 | 0.354 | 2.971 | 1.897 |
|  | **r2** | 0.964 | 0.852 | 0.941 | 0.910 | 0.552 | 0.994 | 0.987 | 0.972 | 0.776 | 0.936 | 0.136 | 0.406 | 0.727 | 0.872 | 0.970 | 0.958 | 0.949 | 0.898 | 0.940 | 0.999 |
| **10** | **slope** | 0.503 | 0.375 | 1.000 | 0.093 | 0.333 | 0.876 | 1.324 | 0.272 | 0.649 | 0.119 | 0.022 | 0.017 | 0.048 | 0.073 | 0.542 | 0.900 | 1.558 | 0.301 | 2.746 | 1.877 |
|  | **r2** | 0.968 | 0.909 | 0.927 | 0.882 | 0.703 | 0.992 | 0.989 | 0.967 | 0.839 | 0.938 | 0.338 | 0.263 | 0.744 | 0.838 | 0.976 | 0.977 | 0.955 | 0.932 | 0.934 | 0.999 |
| **12** | **slope** | 0.482 | 0.334 | 0.937 | 0.088 | 0.244 | 0.863 | 1.366 | 0.279 | 0.554 | 0.122 | 0.025 | 0.007 | 0.052 | 0.070 | 0.516 | 0.861 | 1.459 | 0.277 | 2.561 | 1.869 |
|  | **r2** | 0.968 | 0.934 | 0.922 | 0.861 | 0.847 | 0.992 | 0.992 | 0.966 | 0.864 | 0.931 | 0.357 | 0.100 | 0.750 | 0.803 | 0.981 | 0.981 | 0.961 | 0.940 | 0.935 | 1.000 |
| **14** | **slope** | 0.459 | 0.306 | 0.871 | 0.085 | 0.207 | 0.847 | 1.398 | 0.288 | 0.489 | 0.122 | 0.028 | 0.000 | 0.056 | 0.063 | 0.494 | 0.824 | 1.364 | 0.258 | 2.366 | 1.870 |
|  | **r2** | 0.969 | 0.944 | 0.916 | 0.852 | 0.886 | 0.991 | 0.994 | 0.966 | 0.865 | 0.916 | 0.379 | - | 0.750 | 0.762 | 0.985 | 0.985 | 0.968 | 0.941 | 0.938 | 0.999 |
| **17** | **slope** | 0.428 | 0.270 | 0.759 | 0.088 | 0.174 | 0.818 | 1.450 | 0.300 | 0.402 | 0.111 | 0.035 | 0.000 | 0.061 | 0.062 | 0.469 | 0.783 | 1.245 | 0.231 | 2.068 | 1.884 |
|  | **r2** | 0.969 | 0.957 | 0.913 | 0.818 | 0.884 | 0.991 | 0.996 | 0.968 | 0.859 | 0.890 | 0.417 | - | 0.730 | 0.746 | 0.986 | 0.987 | 0.976 | 0.942 | 0.951 | 0.999 |
| **20** | **slope** | 0.395 | 0.248 | 0.632 | 0.083 | 0.142 | 0.783 | 1.496 | 0.281 | 0.317 | 0.119 | 0.044 | 0.000 | 0.064 | 0.068 | 0.444 | 0.742 | 1.144 | 0.204 | 1.799 | 1.883 |
|  | **r2** | 0.969 | 0.951 | 0.924 | 0.735 | 0.895 | 0.991 | 0.997 | 0.963 | 0.854 | 0.874 | 0.464 | - | 0.668 | 0.709 | 0.988 | 0.987 | 0.982 | 0.947 | 0.969 | 0.999 |
| **22** | **slope** | 0.370 | 0.239 | 0.565 | 0.068 | 0.135 | 0.756 | 1.512 | 0.272 | 0.267 | 0.119 | 0.053 | 0.000 | 0.061 | 0.068 | 0.437 | 0.711 | 1.084 | 0.198 | 1.656 | 1.893 |
|  | **r2** | 0.971 | 0.943 | 0.926 | 0.650 | 0.859 | 0.991 | 0.997 | 0.956 | 0.843 | 0.838 | 0.500 | - | 0.583 | 0.650 | 0.985 | 0.988 | 0.985 | 0.929 | 0.980 | 0.999 |
| **24** | **slope** | 0.360 | 0.223 | 0.502 | 0.081 | 0.132 | 0.728 | 1.542 | 0.255 | 0.218 | 0.108 | 0.064 | 0.000 | 0.051 | 0.064 | 0.429 | 0.679 | 1.032 | 0.191 | 1.537 | 1.875 |
|  | **r2** | 0.962 | 0.928 | 0.921 | 0.688 | 0.844 | 0.992 | 0.997 | 0.947 | 0.825 | 0.776 | 0.542 | - | 0.438 | 0.542 | 0.982 | 0.990 | 0.987 | 0.918 | 0.988 | 0.999 |
| **26** | **slope** | 0.357 | 0.225 | 0.436 | 0.096 | 0.143 | 0.704 | 1.564 | 0.250 | 0.182 | 0.100 | 0.079 | 0.000 | 0.025 | 0.046 | 0.421 | 0.654 | 0.982 | 0.186 | 1.443 | 1.854 |
|  | **r2** | 0.946 | 0.901 | 0.917 | 0.723 | 0.824 | 0.992 | 0.997 | 0.924 | 0.774 | 0.750 | 0.589 | - | 0.188 | 0.348 | 0.976 | 0.989 | 0.988 | 0.883 | 0.994 | 0.999 |
| **28** | **slope** | 0.330 | 0.192 | 0.379 | 0.115 | 0.143 | 0.698 | 1.604 | 0.236 | 0.154 | 0.110 | 0.099 | 0.000 | 0.000 | 0.000 | 0.418 | 0.654 | 0.918 | 0.181 | 1.407 | 1.830 |
|  | **r2** | 0.932 | 0.875 | 0.895 | 0.750 | 0.754 | 0.988 | 0.997 | 0.905 | 0.683 | 0.714 | 0.643 | - | - | - | 0.968 | 0.984 | 0.993 | 0.864 | 0.993 | 0.998 |
| **30** | **slope** | 0.300 | 0.182 | 0.327 | 0.136 | 0.109 | 0.700 | 1.627 | 0.209 | 0.109 | 0.109 | 0.127 | 0.000 | 0.000 | 0.000 | 0.427 | 0.618 | 0.891 | 0.191 | 1.336 | 1.809 |
|  | **r2** | 0.908 | 0.800 | 0.842 | 0.750 | 0.600 | 0.985 | 0.997 | 0.853 | 0.480 | 0.600 | 0.700 | - | - | - | 0.960 | 0.980 | 0.990 | 0.817 | 0.994 | 0.998 |
| **33** | **slope** | 0.274 | 0.179 | 0.179 | 0.143 | 0.179 | 0.679 | 1.679 | 0.226 | 0.107 | 0.000 | 0.190 | 0.000 | 0.000 | 0.000 | 0.405 | 0.643 | 0.821 | 0.179 | 1.274 | 1.857 |
|  | **r2** | 0.813 | 0.714 | 0.714 | 0.571 | 0.714 | 0.973 | 0.995 | 0.747 | 0.257 | - | 0.762 | - | - | - | 0.917 | 0.964 | 0.981 | 0.714 | 0.989 | 0.996 |

| **t1 starting time ** | **Pot ** | S0b-34 | S0c-34 |  |  |  |  |  |  |  |  |  |  |  |  |  |  |  |  |  |  |
| --- | --- | --- | --- | --- | --- | --- | --- | --- | --- | --- | --- | --- | --- | --- | --- | --- | --- | --- | --- | --- | --- |
| **1** | **slope** | 0.173 | 0.346 |  |  |  |  |  |  |  |  |  |  |  |  |  |  |  |  |  |  |
|  | **r2** | 0.508 | 0.694 |  |  |  |  |  |  |  |  |  |  |  |  |  |  |  |  |  |  |
| **3** | **slope** | 0.114 | 0.406 |  |  |  |  |  |  |  |  |  |  |  |  |  |  |  |  |  |  |
|  | **r2** | 0.618 | 0.821 |  |  |  |  |  |  |  |  |  |  |  |  |  |  |  |  |  |  |
| **5** | **slope** | 0.085 | 0.450 |  |  |  |  |  |  |  |  |  |  |  |  |  |  |  |  |  |  |
|  | **r2** | 0.660 | 0.875 |  |  |  |  |  |  |  |  |  |  |  |  |  |  |  |  |  |  |
| **7** | **slope** | 0.064 | 0.492 |  |  |  |  |  |  |  |  |  |  |  |  |  |  |  |  |  |  |
|  | **r2** | 0.714 | 0.912 |  |  |  |  |  |  |  |  |  |  |  |  |  |  |  |  |  |  |
| **10** | **slope** | 0.051 | 0.551 |  |  |  |  |  |  |  |  |  |  |  |  |  |  |  |  |  |  |
|  | **r2** | 0.675 | 0.951 |  |  |  |  |  |  |  |  |  |  |  |  |  |  |  |  |  |  |
| **12** | **slope** | 0.045 | 0.588 |  |  |  |  |  |  |  |  |  |  |  |  |  |  |  |  |  |  |
|  | **r2** | 0.604 | 0.967 |  |  |  |  |  |  |  |  |  |  |  |  |  |  |  |  |  |  |
| **14** | **slope** | 0.043 | 0.623 |  |  |  |  |  |  |  |  |  |  |  |  |  |  |  |  |  |  |
|  | **r2** | 0.577 | 0.979 |  |  |  |  |  |  |  |  |  |  |  |  |  |  |  |  |  |  |
| **17** | **slope** | 0.052 | 0.661 |  |  |  |  |  |  |  |  |  |  |  |  |  |  |  |  |  |  |
|  | **r2** | 0.621 | 0.986 |  |  |  |  |  |  |  |  |  |  |  |  |  |  |  |  |  |  |
| **20** | **slope** | 0.064 | 0.697 |  |  |  |  |  |  |  |  |  |  |  |  |  |  |  |  |  |  |
|  | **r2** | 0.668 | 0.991 |  |  |  |  |  |  |  |  |  |  |  |  |  |  |  |  |  |  |
| **22** | **slope** | 0.074 | 0.718 |  |  |  |  |  |  |  |  |  |  |  |  |  |  |  |  |  |  |
|  | **r2** | 0.700 | 0.993 |  |  |  |  |  |  |  |  |  |  |  |  |  |  |  |  |  |  |
| **24** | **slope** | 0.086 | 0.735 |  |  |  |  |  |  |  |  |  |  |  |  |  |  |  |  |  |  |
|  | **r2** | 0.729 | 0.993 |  |  |  |  |  |  |  |  |  |  |  |  |  |  |  |  |  |  |
| **26** | **slope** | 0.100 | 0.743 |  |  |  |  |  |  |  |  |  |  |  |  |  |  |  |  |  |  |
|  | **r2** | 0.750 | 0.992 |  |  |  |  |  |  |  |  |  |  |  |  |  |  |  |  |  |  |
| **28** | **slope** | 0.115 | 0.758 |  |  |  |  |  |  |  |  |  |  |  |  |  |  |  |  |  |  |
|  | **r2** | 0.750 | 0.990 |  |  |  |  |  |  |  |  |  |  |  |  |  |  |  |  |  |  |
| **30** | **slope** | 0.127 | 0.736 |  |  |  |  |  |  |  |  |  |  |  |  |  |  |  |  |  |  |
|  | **r2** | 0.700 | 0.985 |  |  |  |  |  |  |  |  |  |  |  |  |  |  |  |  |  |  |
| **33** | **slope** | 0.083 | 0.738 |  |  |  |  |  |  |  |  |  |  |  |  |  |  |  |  |  |  |
|  | **r2** | 0.333 | 0.974 |  |  |  |  |  |  |  |  |  |  |  |  |  |  |  |  |  |  |
